# Supplementary material
Source: PubMed Central journal article supplement (PMC2805750)
Supplement: 2009.010272_1.pdf [file 2009.010272_1.pdf]

# Akt is activated in chronic-lymphocytic-leukemia cells and delivers a pro-survival signal: therapeutic potential of Akt inhibition

Jianguo Zhuang,<sup>1</sup> Stephen F. Hawkins,<sup>1</sup> Mark A. Glenn,<sup>1</sup> Ke Lin,<sup>2</sup> Gillian G. Johnson,<sup>2</sup> Anthony Carter,<sup>2</sup> John C. Cawley,<sup>1,2</sup> and Andrew R. Pettitt<sup>1,2</sup>

<sup>1</sup>Division of Hematology, School of Cancer Studies, University of Liverpool, Liverpool, and <sup>2</sup>Department of Hematology, Royal Liverpool and Broadgreen University Hospitals NHS Trust, Liverpool, United Kingdom

Citation: Zhuang J, Hawkins SF, Glenn MA, Lin K, Johnson GG, Carter A, Cawley JC, and Pettitt AR. Akt is activated in chronic-lymphocytic-leukemia cells and delivers a pro-survival signal: therapeutic potential of Akt inhibition. *Haematologica* 2009; doi:10.3324/haematol.2009.010272

©2010 Ferrata Storti Foundation. This is an open-access paper.

## Supplementary Methods

### Knockdown of Akt1 with siRNA

Here,  $1 \times 10^7$  CLL cells were transfected with siRNA duplexes targeting three different regions of the mRNA for human Akt1. To do this, CLL cells were mixed with 100 mL transfection solution (Amaxa) and a total of 2 mg of siRNA duplexes (IDT) or with 2 mg of non-specific control siRNA (IDT) before nucleofection using program X-01. Cells were subsequently cultured at  $5 \times 10^6$ /mL for 72 h, after which levels of Akt1 and

apoptosis or p-GSK-3a and GSK-3a, MCL1 and BCL2 were measured as described in the main text.

The sequences of siRNA duplexes used for transfection to knock down human Akt1 were:-

- i, 5'-CCCUCAGAACAACUCCGAUUCACGTA-3';
- ii, 5'-AGAGGAGCAAGGUUUAAAUUUGUTA-3';
- iii, 5'-GGCAGCACGUGUACGAGAAGAAGCT-3'.

Non-specific control:-

5'-CUUCCUCUCUUUCUCUCCCUUGUCA-3'

Supplementary Table 1. CLL patients' characteristics.

| No. | Sex | Age | Prior therapy | Stage (Binet) | WBC ( $10^9$ /L) | CD38 <sup>+</sup> | IgVH status <sup>1</sup> | Chromosomal abnormalities | p53# | LC50±SD <sup>†</sup> (μM) |
|-----|-----|-----|---------------|---------------|------------------|-------------------|--------------------------|---------------------------|------|---------------------------|
| 1   | M   | 50  | yes           | A             | 35               | 78                | 1.65                     | 13q-                      | N    | 0.46±0.11                 |
| 2   | F   | 79  | no            | A             | 31.8             | 3                 | 14.01                    | 13q-                      | N    | 1.01±0.21                 |
| 3   | M   | 43  | no            | A             | 153              | 29                | 1.75                     | None                      | D    | 0.59±0.17                 |
| 4   | M   | 65  | no            | A             | 183              | 40                | 1.35                     | 13q-                      | D    | 0.71±0.05                 |
| 5   | M   | 56  | no            | A             | 135              | nd‡               | 0                        | None                      | D    | 0.73±0.14                 |
| 6   | M   | 60  | no            | B             | 377              | 18                | 0                        | +12                       | N    | 0.95±0.1                  |
| 7   | F   | 60  | yes           | A             | 45               | nd                | 3.06                     | None                      | N    | 0.52±0.07                 |
| 8   | M   | 65  | no            | B             | 194              | nd                | 2.46                     | 13q-                      | D    | 0.64±0.08                 |
| 9   | M   | 45  | yes           | C             | 28.2             | nd                | 0                        | 17p-                      | D    | 0.96±0.05                 |
| 10  | M   | 77  | yes           | C             | 108              | 53                | 0                        | 11q-                      | D    | 0.76±0.15                 |
| 11  | F   | 70  | yes           | A             | 18               | 3                 | 0.34                     | 17p-                      | D    | 1.62±0.2                  |
| 12  | M   | 56  | no            | A             | 138              | 57                | 0                        | 17p-,13q-                 | D    | 1.04±0.04                 |
| 13  | F   | 62  | no            | A             | 31.5             | 22                | 7.08                     | 13q-                      | N    | 0.34±0.05                 |
| 14  | F   | 61  | yes           | nd            | 183              | nd                | 0.34                     | +12                       | N    | 0.9±0.14                  |
| 15  | F   | 79  | no            | C             | 128              | 28                | 10.47                    | 13q-, +12                 | N    | 0.53±0.18                 |
| 16  | M   | 62  | no            | A             | 45               | 40                | 0                        | +12                       | N    | 0.26±0.12                 |
| 17  | M   | 57  | no            | C             | 171              | 7                 | 0                        | 11q-                      | N    | 0.65±0.52                 |
| 18  | M   | 54  | no            | B             | 257              | 1                 | 0.27                     | 13q-                      | N    | 0.23±0.06                 |
| 19  | M   | 74  | yes           | B             | 91               | 76                | 0                        | 17p-                      | D    | 1.14±0.12                 |
| 20  | F   | 57  | no            | A             | 95               | nd                | 8.15                     | 13q-                      | N    | 0.25±0.04                 |
| 21  | F   | 73  | no            | A             | 63               | 8                 | 0.68                     | 13q-                      | D    | 0.95±0.1                  |
| 22  | F   | 40  | no            | A             | 90.8             | 5                 | nd                       | 13q-                      | N    | 0.44±0.17                 |
| 23  | M   | 39  | no            | A             | 82               | 6                 | 4.47                     | 13q-                      | D    | 1.08±0.2                  |
| 24  | M   | 47  | no            | A             | 153              | 29                | 1.75                     | None                      | N    | nd                        |
| 25  | M   | 76  | no            | B             | 217              | 28                | 2.43                     | None                      | N    | nd                        |
| 26  | M   | 76  | no            | B             | 86               | 28                | 0.69                     | None                      | N    | nd                        |

\*CD38 expression is expressed as percent positive cells.<sup>31</sup> † IgVH status refers to IgVH mutation expressed as the percent deviation from the germ-line sequence.<sup>31</sup> # p53 refers to functional probing of the ATM-p53-p21 pathway using ionising radiation.<sup>5, 52</sup> N = functionally normal p53 response, D = functional impairment of the ATM-p53-p21 pathway associated with mutations in TP53 or ATM. † LC50 values were derived from dose-response experiments using the Akt inhibitor A-443654. ‡ nd: unknown/not done.

**A**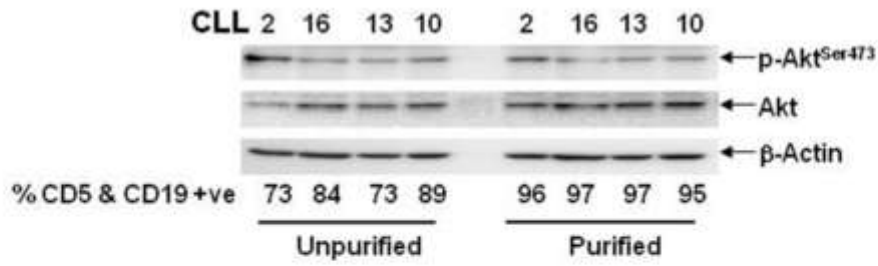**B**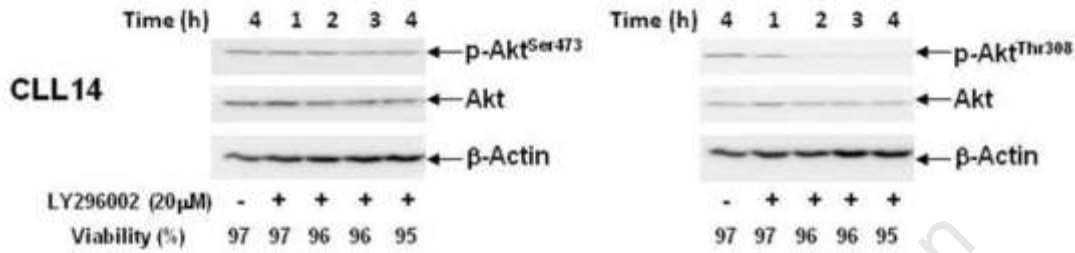**C**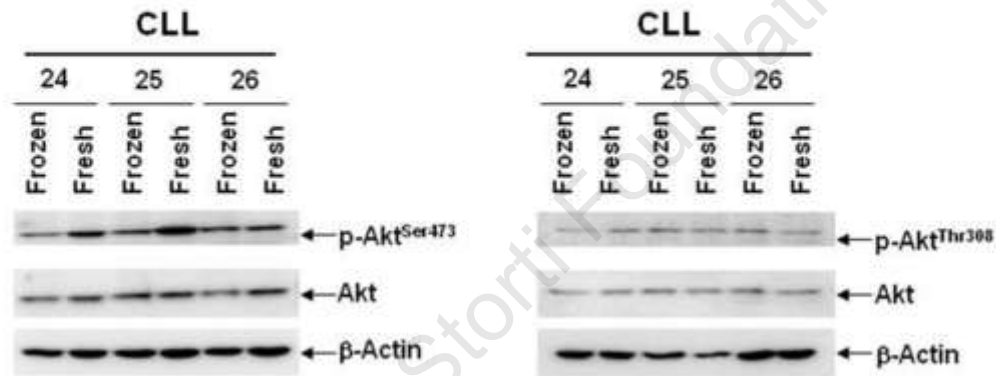

**Supplementary Figure S1.** Phospho-Akt levels are similar in CLL preparations before and after purification and in both fresh and frozen samples. In (A), phospho-Akt levels were compared in CLL samples before and after depletion of contaminating cells (see Text) (n=8, four representative clones shown). In (A), (B) and (C), material extracted from  $1 \times 10^6$  CLL cells in lysis buffer containing 1% Triton X-100 was sonicated before SDS-PAGE. In (B), cells ( $4 \times 10^6$ /mL) were incubated with a specific PI-3K inhibitor (LY296002) for 1-4 h, and Western blotted for p-Akt1 (Ser473) (left panel, rabbit antibody) or p-Akt1 (Thr308) (right panel, mouse monoclonal antibody). Viability was measured by Trypan blue exclusion. In (C), the effect of freezing/thawing on p-Akt (as detected by two different antibodies) in unstimulated CLL cells is shown.
